# Supplementary material for: Examining COVID-19 Mortality Rates by Race and Ethnicity Among Incarcerated People in U.S. State Prisons
Source: bioRxiv or medRxiv preprint supplement (doi:10.1101/2022.06.24.22276470), 2022-06-26
Supplement: Supplementary file [file media-1.pdf]

## SUPPLEMENTAL MATERIALS

**Table A. Race and Ethnicity Reporting by State for Reported Data**

| State | Date                                                                                                                | Metric     | Reported Race and Ethnic Categories                                                                                                                                                 | Methods Notes                                                                                       |
|-------|---------------------------------------------------------------------------------------------------------------------|------------|-------------------------------------------------------------------------------------------------------------------------------------------------------------------------------------|-----------------------------------------------------------------------------------------------------|
| AL    | AL requires a \$25 fee to file a FOIA & informed us they do not collect our requested data                          |            |                                                                                                                                                                                     |                                                                                                     |
| AK    | No reply after 3 outreach attempts                                                                                  |            |                                                                                                                                                                                     |                                                                                                     |
| AZ    | Requested \$1369 for data fulfillment.                                                                              |            |                                                                                                                                                                                     |                                                                                                     |
| AR    | No reply after 3 outreach attempts.                                                                                 |            |                                                                                                                                                                                     |                                                                                                     |
| CA    | 09/2020                                                                                                             | Population | <ul style="list-style-type: none"> <li>Asian, Black, Latino, White, Other</li> <li>Latino individuals were categorized as Hispanic</li> </ul>                                       | CA DOC refused case and death data by RE; Native American or Pacific Islanders reported as “Other.” |
|       | 12/2019                                                                                                             | Population | <ul style="list-style-type: none"> <li>Asian, Black, Hispanic, Native American, Pacific Islander, Other</li> </ul>                                                                  | STATNews                                                                                            |
|       | 08/15/2020                                                                                                          | Death      | <ul style="list-style-type: none"> <li>Asian, Black, Hispanic, Native American, Pacific Islander, Other</li> </ul>                                                                  | STATNews                                                                                            |
| CO    | 12/31/2019                                                                                                          | Population | <ul style="list-style-type: none"> <li>African American, Asian, Caucasian, Hispanic, Native American</li> </ul>                                                                     | Assumed 0 individuals had Unknown race since not reported as a racial category                      |
|       | 10/01/2020                                                                                                          | Population | <ul style="list-style-type: none"> <li>Asian, Black or African American, Caucasian, Hawaiian/Pacific Islander, Hispanic/Latino, Native American/American Indian, Unknown</li> </ul> |                                                                                                     |
|       | 10/01/2020                                                                                                          | Death      | <ul style="list-style-type: none"> <li>Hispanic/Latino, Caucasian</li> </ul>                                                                                                        | 0 deaths assumed for all other RE groups                                                            |
| CT    | 03/01/2020                                                                                                          | Population | <ul style="list-style-type: none"> <li>Asian, Black or African American, Hispanic, Native American/ American Indian/Alaska Native, White, None Specified, Other, Unknown</li> </ul> | \$100.00 fee requested to fulfill request.                                                          |
|       | 10/14/2020                                                                                                          |            |                                                                                                                                                                                     |                                                                                                     |
|       | 10/14/2020                                                                                                          | Death      | <ul style="list-style-type: none"> <li>Black, Hispanic, White</li> </ul>                                                                                                            | 0 deaths assumed for all other RE groups                                                            |
| DE    | Request denied and we were informed only Delaware residents may file FOIAs in Delaware                              |            |                                                                                                                                                                                     |                                                                                                     |
| FL    | Request unanswered; redirected to check the Florida DOC website, though this does not provide the data we requested |            |                                                                                                                                                                                     |                                                                                                     |
| GA    | Requested data not available from GA DOC                                                                            |            |                                                                                                                                                                                     |                                                                                                     |

|    |                                                                                                                 |                  |                                                                                                                                                                                                                  |                                                                                                                                                                                                                                    |
|----|-----------------------------------------------------------------------------------------------------------------|------------------|------------------------------------------------------------------------------------------------------------------------------------------------------------------------------------------------------------------|------------------------------------------------------------------------------------------------------------------------------------------------------------------------------------------------------------------------------------|
| HI | 03/01/2020<br>10/01/2020                                                                                        | Population       | <ul style="list-style-type: none"> <li>• Asian or Pacific Islander, Black or African American, Hispanic, Native American/American Indian/Alaska Native, White, None Specified, Other, and Unknown</li> </ul>     | <ul style="list-style-type: none"> <li>• \$30 paid to file; DOC requested \$1,000</li> <li>• DOC indicated that they could not provide case data by race/ethnicity.</li> <li>• 0 deaths were reported for all RE groups</li> </ul> |
| IA | 03/01/2020<br>10/01/2020                                                                                        | Population       | <ul style="list-style-type: none"> <li>• American Indian/Alaska Native, Asian or Pacific Islander, Black, Hispanic, White, and Unknown</li> </ul>                                                                |                                                                                                                                                                                                                                    |
|    | 10/01/2020                                                                                                      | Case             | <ul style="list-style-type: none"> <li>• American Indian or Alaska Native, Asian or Pacific Islander, Black, Hispanic, White</li> </ul>                                                                          |                                                                                                                                                                                                                                    |
|    | 10/01/2020                                                                                                      | Death            | <ul style="list-style-type: none"> <li>• Black, White</li> </ul>                                                                                                                                                 | 0 deaths assumed for all other RE groups                                                                                                                                                                                           |
| ID | 03/01/2020<br>10/01/2020                                                                                        | Population, case | <ul style="list-style-type: none"> <li>• Asian, Black, Native American, White, Other, Two or more races, Unknown and Unspecified</li> <li>• <i>Ethnic Categories:</i> Hispanic, Not Hispanic, Unknown</li> </ul> |                                                                                                                                                                                                                                    |
|    | 10/01/2020                                                                                                      | Death            | <ul style="list-style-type: none"> <li>• White</li> </ul>                                                                                                                                                        | 0 deaths assumed for all other RE groups                                                                                                                                                                                           |
| IL | IL DOC reports they do not maintain records in the manner we requested                                          |                  |                                                                                                                                                                                                                  |                                                                                                                                                                                                                                    |
| IN | No response after 3 outreach attempts.                                                                          |                  |                                                                                                                                                                                                                  |                                                                                                                                                                                                                                    |
| KS | FY 2019                                                                                                         | Population       | <ul style="list-style-type: none"> <li>• American Indian, Asian, Black, White</li> <li>• <i>Ethnic Categories:</i> Hispanic, Not Hispanic.</li> </ul>                                                            | KS Fiscal Year 2019 Report                                                                                                                                                                                                         |
|    | 10/28/2020                                                                                                      | Death            | <ul style="list-style-type: none"> <li>• Black, White</li> </ul>                                                                                                                                                 | 0 deaths assumed for all other RE groups                                                                                                                                                                                           |
| KY | 03/03/2020<br>10/01/2020                                                                                        | Population       | <ul style="list-style-type: none"> <li>• American Indian/Alaskan Native, Asian or Pacific Islander, Black, Hispanic/Latino, White, Bi-Racial, Unknown</li> </ul>                                                 |                                                                                                                                                                                                                                    |
|    | 10/01/2020                                                                                                      | Death            | <ul style="list-style-type: none"> <li>• Black, White</li> </ul>                                                                                                                                                 | 0 deaths assumed for all other RE groups                                                                                                                                                                                           |
| LA | DOC indicated response would be provided but no data received despite follow-up.                                |                  |                                                                                                                                                                                                                  |                                                                                                                                                                                                                                    |
| MA | 03/01/2020<br>10/01/2020                                                                                        | Population       | <ul style="list-style-type: none"> <li>• American Indian/Alaska Native, Asian, Black, Hispanic, Native Hawaiian or Pacific Islander, White, Other.</li> </ul>                                                    |                                                                                                                                                                                                                                    |
|    | 10/01/2020                                                                                                      | Death            | <ul style="list-style-type: none"> <li>• American Indian, Black, White, Other</li> </ul>                                                                                                                         | 0 deaths assumed for all other RE groups                                                                                                                                                                                           |
| MD | In October 2020, MD DOC requested a 30-day time extension to fulfill request. No data was received from MD DOC. |                  |                                                                                                                                                                                                                  |                                                                                                                                                                                                                                    |
| ME | 06/2020                                                                                                         | Population       | <ul style="list-style-type: none"> <li>• Asian, Black or African American, Native American, Native Hawaiian, White, Two or More Races, Unknown</li> </ul>                                                        | Maine DOC Adult Data Report Reported 0 deaths related to COVID-19.                                                                                                                                                                 |

|    |                                                                                                                                    |                                 |                                                                                                                                                                                                                                                           |                                                                                                                                                                                                                                                                        |
|----|------------------------------------------------------------------------------------------------------------------------------------|---------------------------------|-----------------------------------------------------------------------------------------------------------------------------------------------------------------------------------------------------------------------------------------------------------|------------------------------------------------------------------------------------------------------------------------------------------------------------------------------------------------------------------------------------------------------------------------|
| MI | 03/01/2020<br>09/01/2020                                                                                                           | Population, case<br>data        | <ul style="list-style-type: none"> <li>American Indian or Alaskan Native, Asian, Black or African American, Hispanic or Latino, Pacific Islander or Native Hawaiian, Unknown, White</li> </ul>                                                            |                                                                                                                                                                                                                                                                        |
|    | 09/01/2020                                                                                                                         | Death                           | <ul style="list-style-type: none"> <li>Black, Hispanic White</li> </ul>                                                                                                                                                                                   | 0 deaths assumed for all other RE groups                                                                                                                                                                                                                               |
| MN | 03/01/2020<br>10/01/2020                                                                                                           | Population, case,<br>death data | <ul style="list-style-type: none"> <li>American Indian, Asian, Black, White, Unknown</li> <li><i>Ethnic categories:</i> Hispanic</li> </ul>                                                                                                               |                                                                                                                                                                                                                                                                        |
| MO | Did not fulfill FOIA and redirected us to the MO DOC webpage which does not provide the data we requested.                         |                                 |                                                                                                                                                                                                                                                           |                                                                                                                                                                                                                                                                        |
| MS | No response after 3 outreach attempts.                                                                                             |                                 |                                                                                                                                                                                                                                                           |                                                                                                                                                                                                                                                                        |
| MT | No response after 3 outreach attempts.                                                                                             |                                 |                                                                                                                                                                                                                                                           |                                                                                                                                                                                                                                                                        |
| NC | 03/01/2020<br>10/01/2020                                                                                                           | Population                      | <ul style="list-style-type: none"> <li>Asian/ORL, Black, Indian, White, Other, Unknown</li> <li><i>Ethnic categories:</i> African, American Indian, Asian, European/ N.Am./ Austr, Hispanic/Latino, Oriental, Pacific Islander, Other, Unknown</li> </ul> | Race categories were used as race categories and only “Hispanic” was considered ethnicity from the ethnic categories.                                                                                                                                                  |
|    | 10/01/2020                                                                                                                         | Death                           | <ul style="list-style-type: none"> <li>Black, Hispanic/Latino, White, Other</li> </ul>                                                                                                                                                                    | “Hispanic” was reported as race in death data, but 0 COVID-19 deaths in Hispanic individuals.                                                                                                                                                                          |
| ND | 03/01/2020<br>10/01/2020                                                                                                           | Population                      | <ul style="list-style-type: none"> <li>Asian, Black, Caucasian, Hawaiian, Hispanic, Native American, Other/Mixed</li> </ul>                                                                                                                               | Caucasian and White were aggregated; “Nat,” “Native,” and “Native American” were aggregated; Hispanic was reported as race in all data, and as ethnicity in case data; counts for Hispanic race and Hispanic ethnicity were the same; 0 deaths from COVID-19 reported/ |
|    | 10/01/2020                                                                                                                         | Case data                       | <ul style="list-style-type: none"> <li>Asian, Black, Caucasian, His, Nat, Native, White, Other/Multiple</li> <li><i>Ethnic categories:</i> Hispanic, Not Hispanic</li> </ul>                                                                              | Case data reported at the level of each test, not individual. Records with the same date of birth, sex, race, ethnicity, and facility corresponded to the same individual.                                                                                             |
| NE | 03/01/2020<br>10/08/2020                                                                                                           | Population                      | <ul style="list-style-type: none"> <li>Asian, Black, Hispanic, Native American, Pacific Islander, White, Other, Unknown</li> </ul>                                                                                                                        | 03/01/2020: average daily population 1/1–3/30, 2020; 10/08/2020: average daily population 5/5– 10/8, 2020; Based on reported proportions, we assumed 5 were “Unknown” race and 4 were “Hawaiian and Pacific Islander.”                                                 |
|    | 10/08/2020                                                                                                                         | Case data                       | <ul style="list-style-type: none"> <li>Asian, Black, Hispanic, Native American, White, None Specified, Other</li> </ul>                                                                                                                                   |                                                                                                                                                                                                                                                                        |
|    | 10/01/2020                                                                                                                         | Death data                      | <ul style="list-style-type: none"> <li>Death analyzed as “Unknown”</li> </ul>                                                                                                                                                                             | Death identified by press release                                                                                                                                                                                                                                      |
| NH | NH DOC stated there have been 0 deaths in their system and that they do not track any of the metrics we requested by demographics. |                                 |                                                                                                                                                                                                                                                           |                                                                                                                                                                                                                                                                        |
| NJ | No data disaggregated by race/ethnicity was provided.                                                                              |                                 |                                                                                                                                                                                                                                                           |                                                                                                                                                                                                                                                                        |

|    |                                                                                                                        |                  |                                                                                                                                                        |                                                                                                                                                                                                                                                                                                                                                                                                            |
|----|------------------------------------------------------------------------------------------------------------------------|------------------|--------------------------------------------------------------------------------------------------------------------------------------------------------|------------------------------------------------------------------------------------------------------------------------------------------------------------------------------------------------------------------------------------------------------------------------------------------------------------------------------------------------------------------------------------------------------------|
| NM | No data disaggregated by race/ethnicity was provided.                                                                  |                  |                                                                                                                                                        |                                                                                                                                                                                                                                                                                                                                                                                                            |
| NV | 03/08/20200<br>9/27/2020                                                                                               | Population       | <ul style="list-style-type: none"> <li>African American, American Indian, Asian, Caucasian, Hispanic, Other</li> </ul>                                 | 488 (03/08/20) and 459 (09/27/20) individuals, held in facilities outside of NV or in residential confinement, but could not be excluded since based on data provided; NV did not release case data based on: "Under NRS 441A.220, Confidentiality of Information, the release of these 38 offender's [sic] age and race/ethnicity might compromise the medical right to privacy."; DOC reported 0 deaths. |
| NY | 03/01/20201<br>0/01/2020                                                                                               | Population       | <ul style="list-style-type: none"> <li>African American, Asian, Hispanic, Native American, White, Other</li> </ul>                                     | Data received 7 months after first filing                                                                                                                                                                                                                                                                                                                                                                  |
|    | 10/01/2020                                                                                                             | Case, death data | <ul style="list-style-type: none"> <li>Asian, Black, Hispanic, Native American, White, Other, Unknown</li> </ul>                                       |                                                                                                                                                                                                                                                                                                                                                                                                            |
| OH | OH DOC consulted a staff attorney in response to our FOIA and did not send updates or data in response to our request. |                  |                                                                                                                                                        |                                                                                                                                                                                                                                                                                                                                                                                                            |
| OK | OK DOC indicated they would fulfill our request by 2/12/21 but no data was received                                    |                  |                                                                                                                                                        |                                                                                                                                                                                                                                                                                                                                                                                                            |
| OR | 03/01/20201<br>0/01/2020                                                                                               | Population       | <ul style="list-style-type: none"> <li>American Indian, Asian, Black, Hispanic, Pacific Islander, White, Unknown</li> </ul>                            | 0 assumed for "Unknown"; DOC reported they do not track COVID-19 cases by RE                                                                                                                                                                                                                                                                                                                               |
|    | 10/01/2020                                                                                                             | Death data       | <ul style="list-style-type: none"> <li>Black, Hispanic, White</li> </ul>                                                                               |                                                                                                                                                                                                                                                                                                                                                                                                            |
| PA | 03/01/20201<br>0/01/2020                                                                                               | Population       | <ul style="list-style-type: none"> <li>Asian, Black, Hispanic, Indian, White, Other</li> </ul>                                                         | DOC reported they do not possess records of COVID-19 cases by RE                                                                                                                                                                                                                                                                                                                                           |
|    | 10/01/2020                                                                                                             | Death data       | <ul style="list-style-type: none"> <li>Black, Hispanic, White</li> </ul>                                                                               | 0 deaths assumed for all other RE groups                                                                                                                                                                                                                                                                                                                                                                   |
| RI | 03/31/2020<br>09/30/2020                                                                                               | Population       | <ul style="list-style-type: none"> <li>American Indian, Asian, Black, Hispanic, White, Other</li> </ul>                                                | Cases were not reported by RE because, per DOC, "this is missing for the majority of lab reports."; DOC reported 0 deaths.                                                                                                                                                                                                                                                                                 |
| SC | SC DOC stated they do not track the data we requested.                                                                 |                  |                                                                                                                                                        |                                                                                                                                                                                                                                                                                                                                                                                                            |
| SD | 02/29/2020<br>09/30/2020                                                                                               | Population       | <ul style="list-style-type: none"> <li>Asian, Black, Hispanic or Latino, Native American, Native Hawaiian or Pacific Islander, White, Other</li> </ul> | Custody population excludes temporary absences, individuals under SD DOC custody who are housed out of state, and those on extended confinement; DOC reported 0 COVID-19 deaths, RE of positive tests was not recorded                                                                                                                                                                                     |
| TN | FOIA rejected. TN DOC requires a TN resident to file a FOIA.                                                           |                  |                                                                                                                                                        |                                                                                                                                                                                                                                                                                                                                                                                                            |
| TX | 08/31/2019                                                                                                             | Population       | <ul style="list-style-type: none"> <li>Black, Hispanic, White, Other and Unknown</li> </ul>                                                            | Texas Department of Criminal Justice (TDCJ) reported no responsive records and data were confidential;                                                                                                                                                                                                                                                                                                     |

Custody population data excluded “Substance Abuse Felony Punishment” facilities

|    |                                                                                                                                                 |            |                                                                                                                                                                                             |                                                                                                                                                                                                                                                                                                                                                                                                                          |
|----|-------------------------------------------------------------------------------------------------------------------------------------------------|------------|---------------------------------------------------------------------------------------------------------------------------------------------------------------------------------------------|--------------------------------------------------------------------------------------------------------------------------------------------------------------------------------------------------------------------------------------------------------------------------------------------------------------------------------------------------------------------------------------------------------------------------|
|    | 10/01/2020                                                                                                                                      | Death data | Black, Hispanic, White, Other                                                                                                                                                               | Texas Justice Initiative                                                                                                                                                                                                                                                                                                                                                                                                 |
| UT | UT DOC redirected us to their website and did not provide further information. Their website did not contain records responsive to our request. |            |                                                                                                                                                                                             |                                                                                                                                                                                                                                                                                                                                                                                                                          |
| VA | VA DOC requires a VA resident to file a FOIA.                                                                                                   |            |                                                                                                                                                                                             |                                                                                                                                                                                                                                                                                                                                                                                                                          |
| VT | 03/01/2020<br>09/30/2020                                                                                                                        | Population | <ul style="list-style-type: none"> <li>American Indian, Asian/Pacific Islander, Black, Hispanic, Other/Unknown</li> </ul>                                                                   |                                                                                                                                                                                                                                                                                                                                                                                                                          |
|    | 10/15/2020                                                                                                                                      | Case data  | <ul style="list-style-type: none"> <li>American Indian/Alaskan Native, Asian/Pacific Islander, Black, White, Other/Unknown</li> </ul>                                                       | Case data was provided as percentages by RE; 0 deaths from COVID-19 reported                                                                                                                                                                                                                                                                                                                                             |
| WA | 03/31/2020<br>09/30/2020                                                                                                                        | Population | <ul style="list-style-type: none"> <li>American Indian/Alaska Native, Asian/Pacific Islander, Black, White, Other, Unknown</li> <li><i>Ethnicity categories:</i> Hispanic Origin</li> </ul> | Reported data indicates 1 death (male, race: other), but the DOC website reported 2 deaths (race not reported), our analysis based on data obtained by FOIA                                                                                                                                                                                                                                                              |
|    | 10/01/2020                                                                                                                                      | Case data  | <ul style="list-style-type: none"> <li>Asian/Pacific Islander, Black, American Indian/Alaska Native, White, Other, Unknown</li> </ul>                                                       |                                                                                                                                                                                                                                                                                                                                                                                                                          |
|    | 10/01/2020                                                                                                                                      | Death data | <ul style="list-style-type: none"> <li><i>Race categories:</i> Other</li> </ul>                                                                                                             |                                                                                                                                                                                                                                                                                                                                                                                                                          |
| WI | 02/29/2020<br>9/30/2020                                                                                                                         | Population | <ul style="list-style-type: none"> <li>American Indian/Alaskan Native, Asian or Pacific Islander, Black, White</li> <li><i>Ethnicity categories:</i> Hispanic</li> </ul>                    | Custody population by RE was provided as percentages out of a total; Death data not provided due to the following reason: “Our agency does not determine cause or contributing factors of death in any instance. That determination is made by the local medical examiner/coroner. Furthermore, confidentiality laws and privacy protections prevent our agency from sharing any information related to cause of death.” |
|    | 10/08/2020                                                                                                                                      | Population | <ul style="list-style-type: none"> <li>American Indian/Alaska Native, Asian or Pacific Islander, Black or African American, White, Unknown</li> </ul>                                       |                                                                                                                                                                                                                                                                                                                                                                                                                          |
| WV | 06/2019                                                                                                                                         | Population | <ul style="list-style-type: none"> <li>American Indian/Alaska Native, Asian, Black, Hispanic or Latino, Native Hawaiian or Pacific Islander, White, Multi-Racial or Other</li> </ul>        | WV Fiscal Year 2019 Annual Report; FOIA required mail submission; Case and death data by RE not reported                                                                                                                                                                                                                                                                                                                 |
| WY | WY DOC does not have the requested information disaggregated by race/ethnicity.                                                                 |            |                                                                                                                                                                                             |                                                                                                                                                                                                                                                                                                                                                                                                                          |

All race and ethnicities categories reported below are displayed as reported by their respective state. In our analysis, categories such as “Other,” “Multi-Racial,” “Two or More” were classified as “Other,” while “Unknown” and “Not Specified” were classified as “Unknown.”

**Table B. Variation in “Asian American, Native Hawaiian, and Pacific Islander” and “Native American and Alaskan Native” Race Reporting in Custody Population**

| <b>Race Category Reported</b>                    | <b>States (n=26)</b>                                       | <b>No. (%)</b> |
|--------------------------------------------------|------------------------------------------------------------|----------------|
| Asian                                            | CA, CO, CT, ID, KS, MN, NC, NV, NY, PA, RI                 | 11 (42)        |
| Asian American & Pacific Islander                | HI, IA, KY, VT, WA, WI                                     | 6 (23)         |
| 1) Asian,<br>2) Native Hawaiian/Pacific Islander | MA, MI, SD, WV                                             | 4 (15)         |
| 1) Asian<br>2) Pacific Islander                  | NE, OR                                                     | 2 (8)          |
| 1) Asian<br>2) Native Hawaiian                   | ME, ND                                                     | 2 (8)          |
| None                                             | TX                                                         | 1 (4)          |
| <b>Race Category Reported</b>                    | <b>States</b>                                              | <b>Freq.</b>   |
| Native American & American Indian                | CO, ID, KS, ME, MN, NC, ND, NE, NV, NY, OR, PA, RI, SD, VT | 15 (58)        |
| American Indian & Alaskan Native                 | CT, HI, IA, KY, MA, MI, WA, WI, WV                         | 9 (35)         |
| None                                             | CA, TX                                                     | 2 (8)          |

**Table C. Race-Disaggregated Crude COVID-19 Case and Death Data by States**

| State | Race & Ethnicity | 03.01.20<br>Population | Cases        | Deaths    |
|-------|------------------|------------------------|--------------|-----------|
| CA    | White            | 25633                  | 3010 (11.7%) | 22 (0.1%) |
|       | Black            | 35231                  | 2707 (7.7%)  | 14 (0%)   |
|       | Hispanic         | 55381                  | 5478 (9.9%)  | 28 (0.1%) |
|       | Asian            | 1718                   | 179 (10.4%)  | 4 (0.2%)  |
|       | Native American  | N/A                    | N/A          | 1         |
|       | Other            | 6396                   | 690 (10.8%)  | 14 (0.2%) |
| CO    | White            | 7976                   | 415 (5.2%)   | 2 (0%)    |
|       | Black            | 3128                   | 142 (4.5%)   | 0 (0%)    |
|       | Hispanic         | 5588                   | 288 (5.2%)   | 1 (0%)    |
|       | Asian            | 225                    | 10 (4.4%)    | 0 (0%)    |
|       | Native American  | 683                    | 38 (5.6%)    | 0 (0%)    |
|       | Other            | N/A                    | N/A          | N/A       |
| CT    | White            | 3653                   | 459 (12.6%)  | 1 (0%)    |
|       | Black            | 5349                   | 637 (11.9%)  | 4 (0.1%)  |
|       | Hispanic         | 3307                   | 530 (16%)    | 2 (0.1%)  |
|       | Asian            | 61                     | 4 (6.6%)     | 0 (0%)    |
|       | Native American  | 41                     | 4 (9.8%)     | 0 (0%)    |
|       | Other            | N/A                    | N/A          | N/A       |
| HI    | White            | 1266                   | N/A          | 0 (0%)    |
|       | Black            | 230                    | N/A          | 0 (0%)    |
|       | Hispanic         | N/A                    | N/A          | N/A       |
|       | Asian            | 3397                   | N/A          | 0 (0%)    |
|       | Native American  | 53                     | N/A          | 0 (0%)    |
|       | Other            | 326                    | N/A          | 0 (0%)    |
| IA    | White            | 5561                   | 798 (14.3%)  | 3 (0.1%)  |
|       | Black            | 2128                   | 269 (12.6%)  | 1 (0%)    |
|       | Hispanic         | 580                    | 60 (10.3%)   | 0 (0%)    |
|       | Asian            | 68                     | 13 (19.1%)   | 0 (0%)    |
|       | Native American  | 167                    | 22 (13.2%)   | 0 (0%)    |
|       | Other            | N/A                    | N/A          | N/A       |
| ID    | White            | 5854                   | 1216 (20.8%) | 2 (0%)    |
|       | Black            | 260                    | 57 (21.9%)   | 0 (0%)    |
|       | Hispanic         | 1154                   | 266 (23.1%)  | 0 (0%)    |
|       | Asian            | 34                     | 6 (17.6%)    | 0 (0%)    |

| State | Race & Ethnicity | 03.01.20<br>Population | Cases        | Deaths    |
|-------|------------------|------------------------|--------------|-----------|
|       | Native American  | 304                    | 80 (26.3%)   | 0 (0%)    |
|       | Other            | 213                    | 27 (22.3%)   | 0 (0%)    |
| KS    | White            | 6852                   | N/A          | 2 (0%)    |
|       | Black            | 2828                   | N/A          | 5 (0.2%)  |
|       | Hispanic         | 1235                   | N/A          | 0 (0%)    |
|       | Asian            | 94                     | N/A          | 0 (0%)    |
|       | Native American  | 270                    | N/A          | 0 (0%)    |
|       | Other            | N/A                    | N/A          | N/A       |
| KY    | White            | 8639                   | N/A          | 6 (0.1%)  |
|       | Black            | 3125                   | N/A          | 5 (0.2%)  |
|       | Hispanic         | 232                    | N/A          | 0 (0%)    |
|       | Asian            | 26                     | N/A          | 0 (0%)    |
|       | Native American  | 10                     | N/A          | 0 (0%)    |
|       | Other            | 170                    | N/A          | N/A       |
| MA    | White            | 3334                   | N/A          | 4 (0.1%)  |
|       | Black            | 2259                   | N/A          | 2 (0.1%)  |
|       | Hispanic         | 2064                   | N/A          | 0 (0%)    |
|       | Asian            | 119                    | N/A          | 0 (0%)    |
|       | Native American  | 44                     | N/A          | 1 (2.3%)  |
|       | Other            | 277                    | N/A          | 1 (0.9%)  |
| ME    | White            | 1732                   | N/A          | 0 (0%)    |
|       | Black            | 225.6                  | N/A          | 0 (0%)    |
|       | Hispanic         | N/A                    | N/A          | N/A       |
|       | Asian            | 20.38                  | N/A          | 0 (0%)    |
|       | Native American  | 56.8                   | N/A          | 0 (0%)    |
|       | Other            | N/A                    | N/A          | N/A       |
| MI    | White            | 16545                  | 3239 (19.6%) | 36 (0.2%) |
|       | Black            | 19971                  | 3682 (18.4%) | 33 (0.2%) |
|       | Hispanic         | 998                    | 192 (19.2%)  | 1 (0.1%)  |
|       | Asian            | 133                    | 20 (15%)     | 0 (0%)    |
|       | Native American  | 422                    | 88 (20.9%)   | 0 (0%)    |
|       | Other            | N/A                    | N/A          | N/A       |
| MN    | White            | 4101                   | 227 (5.5%)   | 1 (0%)    |
|       | Black            | 3317                   | 154 (4.6%)   | 1 (0%)    |
|       | Hispanic         | 489                    | 30 (6.1%)    | 0 (0%)    |
|       | Asian            | 235                    | 10 (4.3%)    | 0 (0%)    |
|       | Native American  | 778                    | 39 (5%)      | 0 (0%)    |



| State | Race & Ethnicity | 03.01.20<br>Population | Cases       | Deaths   |
|-------|------------------|------------------------|-------------|----------|
|       | Other            | 9                      | N/A         | N/A      |
| NC    | White            | 13904                  | 1266 (9.1%) | 6 (0%)   |
|       | Black            | 17805                  | 1471 (8.3%) | 9 (0.1%) |
|       | Hispanic         | 1884                   | 259 (13.7%) | 0 (0%)   |
|       | Asian            | 102                    | 11 (10.8%)  | 0 (0%)   |
|       | Native American  | 681                    | 66 (9.7%)   | 0 (0%)   |
|       | Other            | 207                    | 24 (11.6%)  | 1 (0.1%) |
| ND    | White            | 1092                   | 17 (1.6%)   | 0 (0%)   |
|       | Black            | 190                    | 2 (1.1%)    | 0 (0%)   |
|       | Hispanic         | 112                    | 0 (0%)      | 0 (0%)   |
|       | Asian            | 10                     | 0 (0%)      | 0 (0%)   |
|       | Native American  | 391                    | 7 (1.8%)    | 0 (0%)   |
|       | Other            | 11                     | 0 (0%)      | 0 (0%)   |
| NE    | White            | 2949                   | 132 (4.5%)  | 0 (0%)   |
|       | Black            | 1555                   | 64 (4.1%)   | 0 (0%)   |
|       | Hispanic         | 822                    | 37 (4.5%)   | 0 (0%)   |
|       | Asian            | 52                     | 1 (1.9%)    | 0 (0%)   |
|       | Native American  | 276                    | 5 (1.8%)    | 0 (0%)   |
|       | Other            | 38                     | 2 (5.3%)    | 0 (0%)   |
| NV    | White            | 5545                   | N/A         | 0 (0%)   |
|       | Black            | 3954                   | N/A         | 0 (0%)   |
|       | Hispanic         | 2718                   | N/A         | 0 (0%)   |
|       | Asian            | 370                    | N/A         | 0 (0%)   |
|       | Native American  | 227                    | N/A         | 0 (0%)   |
|       | Other            | 58                     | N/A         | 0 (0%)   |
| NY    | White            | 10486                  | 127 (1.2%)  | 1 (0%)   |
|       | Black            | 21251                  | 391 (1.8%)  | 10 (0%)  |
|       | Hispanic         | 10624                  | 236 (2.2%)  | 4 (0%)   |
|       | Asian            | 256                    | 6 (2.3%)    | 2 (0.8%) |
|       | Native American  | 408                    | 9 (2.2%)    | 0 (0%)   |
|       | Other            | 761                    | 10 (1.3%)   | 0 (0%)   |
| OR    | White            | 10370                  | N/A         | 6 (0.1%) |
|       | Black            | 1382                   | N/A         | 1 (0.1%) |
|       | Hispanic         | 1948                   | N/A         | 2 (0.1%) |
|       | Asian            | 263                    | N/A         | 0 (0%)   |
|       | Native American  | 469                    | N/A         | 0 (0%)   |
|       | Other            | 3                      | N/A         | N/A      |

| State | Race & Ethnicity | 03.01.20<br>Population | Cases      | Deaths    |
|-------|------------------|------------------------|------------|-----------|
| PA    | White            | 19431                  | N/A        | 3 (0%)    |
|       | Black            | 20631                  | N/A        | 7 (0%)    |
|       | Hispanic         | 4313                   | N/A        | 1 (0%)    |
|       | Asian            | 118                    | N/A        | 0 (0%)    |
|       | Native American  | 40                     | N/A        | 0 (0%)    |
|       | Other            | 210                    | N/A        | 0 (0%)    |
| RI    | White            | 961                    | N/A        | 0 (0%)    |
|       | Black            | 707                    | N/A        | 0 (0%)    |
|       | Hispanic         | 646                    | N/A        | 0 (0%)    |
|       | Asian            | 38                     | N/A        | 0 (0%)    |
|       | Native American  | 24                     | N/A        | 0 (0%)    |
|       | Other            | 46                     | N/A        | 0 (0%)    |
| SD    | White            | 1980                   | N/A        | 0 (0%)    |
|       | Black            | 309                    | N/A        | 0 (0%)    |
|       | Hispanic         | 149                    | N/A        | 0 (0%)    |
|       | Asian            | 27                     | N/A        | 0 (0%)    |
|       | Native American  | 1305                   | N/A        | 0 (0%)    |
|       | Other            | 11                     | N/A        | 0 (0%)    |
| TX    | White            | 47191                  | N/A        | 60 (0.1%) |
|       | Black            | 45761                  | N/A        | 64 (0.1%) |
|       | Hispanic         | 46375                  | N/A        | 73 (0.2%) |
|       | Asian            | N/A                    | N/A        | N/A       |
|       | Native American  | N/A                    | N/A        | N/A       |
|       | Other            | 797                    | N/A        | 2 (0.3%)  |
| VT    | White            | 1402                   | 44 (3.1%)  | 0 (0%)    |
|       | Black            | 153                    | 9 (5.9%)   | 0 (0%)    |
|       | Hispanic         | 4                      | 0 (0%)     | 0 (0%)    |
|       | Asian            | 6                      | 0 (0%)     | 0 (0%)    |
|       | Native American  | 18                     | 0 (0%)     | 0 (0%)    |
|       | Other            | 56                     | 2 (3.6%)   | 0 (0%)    |
| WA    | White            | 13083                  | 325 (2.5%) | 0 (0%)    |
|       | Black            | 3308                   | 68 (2.1%)  | 0 (0%)    |
|       | Hispanic         | 2726                   | 71 (2.6%)  | N/A       |
|       | Asian            | 808                    | 16 (2%)    | 0 (0%)    |
|       | Native American  | 1109                   | 34 (3.1%)  | 0 (0%)    |
|       | Other            | 300                    | 8 (2.7%)   | 1 (0.3%)  |
| WI    | White            | 12142                  | 662 (5.5%) | N/A       |

| State | Race & Ethnicity | 03.01.20<br>Population | Cases      | Deaths   |
|-------|------------------|------------------------|------------|----------|
|       | Black            | 9902                   | 763 (7.7%) | N/A      |
|       | Hispanic         | 1785                   | N/A        | N/A      |
|       | Asian            | 232                    | 20 (8.6%)  | N/A      |
|       | Native American  | 989                    | 49 (5%)    | N/A      |
|       | Other            | N/A                    | N/A        | N/A      |
| WV    | White            | 5012                   | 0 (0%)     | 0 (0%)   |
|       | Black            | 727                    | 0 (0%)     | 0 (0%)   |
|       | Hispanic         | 25                     | 0 (0%)     | 0 (0%)   |
|       | Asian            | 5                      | 0 (0%)     | 0 (0%)   |
|       | Native American  | 4                      | 0 (0%)     | 0 (0%)   |
|       | Other            | 48                     | N/A        | 3 (6.2%) |
